# Supplementary material for: Self-assembling microsized materials to fabricate multifunctional hierarchical nanostructures on macroscale substrates
Source: Royal Society of Chemistry journal article supplement (doi:10.1039/c3ta10704c), 2013-01-01
Supplement: c3ta10704c.pdf [file c3ta10704c.pdf]

## **Electronic Supplementary Information**

### **Self-assembling micro-sized materials to fabricate multifunctional hierarchical nanostructures on macroscale substrates**

Fig. S1. FWHM values of XRD diffraction peaks of ZnO nanoflowers synthesized at different precursor concentrations.

Fig. S2. FE-SEM image of PEI/(PSS/ZnO)<sub>3</sub> assembled at room temperature.

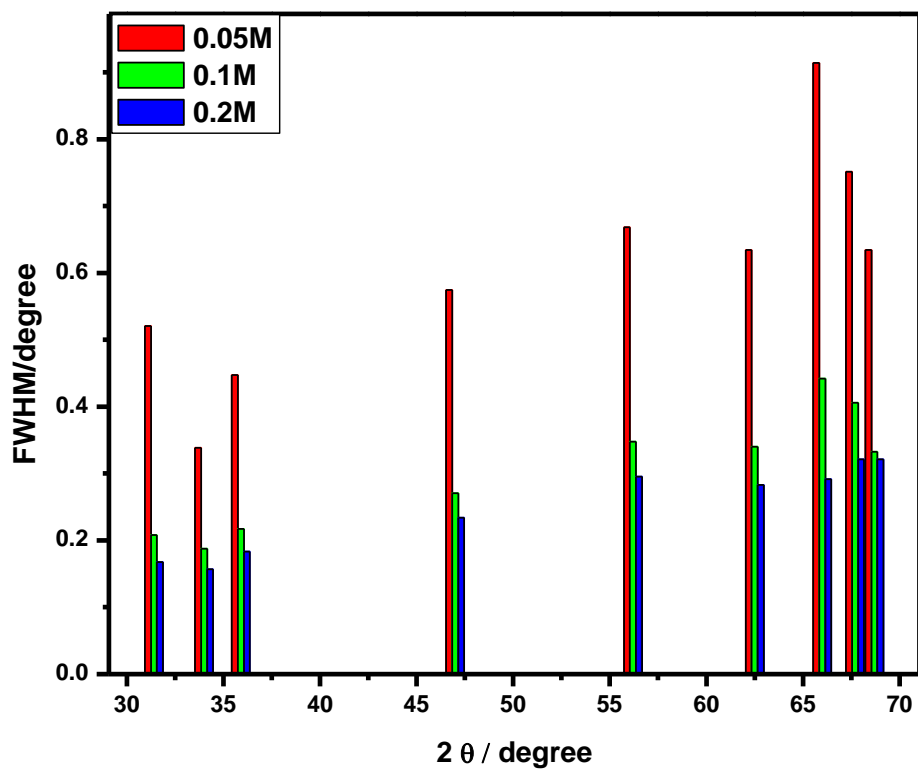

Figure S1. FWHM values of XRD diffraction peaks of ZnO nanoflowers synthesized at different precursor concentrations.

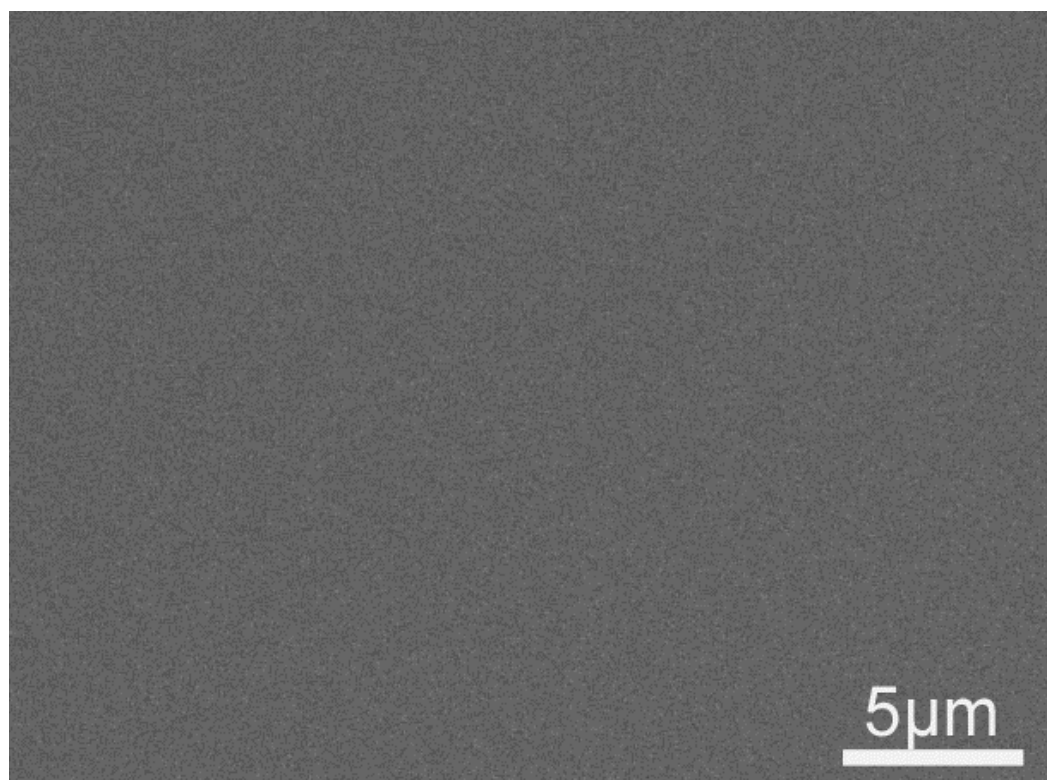

Figure S2. FE-SEM image of PEI/(PSS/ZnO)<sub>3</sub> assembled at room temperature.
